# Supplementary material for: Interspecies Transmission from Pigs to Ferrets of Antigenically Distinct Swine H1 Influenza A Viruses with Reduced Reactivity to Candidate Vaccine Virus Antisera as Measures of Relative Zoonotic Risk
Source: MDPI journal article supplement (doi:10.3390/v14112398), 2022-10-29
Supplement: s1 [file s1]

# **Interspecies Transmission from Pigs to Ferrets of Antigenically Distinct Swine H1 Influenza A Viruses with Reduced Reactivity to Candidate Vaccine Virus Antisera as Measures of Relative Zoonotic Risk**

J. Brian Kimble<sup>1#</sup>, Carine K. Souza<sup>1</sup>, Tavis K. Anderson<sup>1</sup>, Zebulun W. Arendsee<sup>1</sup>, David E. Hufnagel<sup>1</sup>, Katharine M. Young<sup>1</sup>, Nicola S. Lewis<sup>2</sup>, C. Todd Davis<sup>3</sup>, Sharmi Thor <sup>3</sup>, Amy L. Vincent Baker<sup>1,\*</sup>

<sup>1</sup>Virus Prion Research Unit, National Animal Disease Center, USDA-ARS, Ames IA.

<sup>2</sup>Department of Pathology and Population Sciences, Royal Veterinary College, University of London, Hertfordshire, UK.

<sup>3</sup>Influenza Division, National Center for Immunization and Respiratory Diseases, Centers for Disease Control and Prevention, Atlanta GA.

\*Address correspondence to Amy Vincent Baker, amy.vincent@usda.gov

#Current address: Foreign Arthropod-borne Animal Disease Research Unit, National Bio and Agro-Defense Facility, USDA-ARS, Manhattan, KS

## SUPPLEMENTAL MATERIAL

**Table S1.** Amino acid differences between 1A.1.1.3 clade consensus, the within-clade CVV A/Ohio/24/2017, and the clade representative viruses A/swine/North Carolina/A02245416/2020 and A/swine/Texas/A02245420/2020. The clade includes a two amino acid deletion and H1 numbering and corresponding 1A.1.1.3 sequential numbering are presented.

| 1A.1.1.3                   | H1<br>numbering | 1A.1.1.3<br>numbering | 1A.1.1.3<br>consensus | A/Ohio/24/2017 CVV | A/swine/NC/A02245416/2020 | A/swine/Tx/A02245420/2020 |
|----------------------------|-----------------|-----------------------|-----------------------|--------------------|---------------------------|---------------------------|
|                            | 14              | 14                    | D                     |                    |                           | E                         |
|                            | 48              | 48                    | A                     |                    |                           | P                         |
|                            | 68              | 68                    | E                     |                    | G                         |                           |
|                            | 119             | 119                   | M                     | I                  |                           | I                         |
|                            | 126             | 126                   | Y                     | H                  |                           |                           |
|                            | 132             | 130                   | V                     |                    |                           | E                         |
|                            | 138             | 136                   | D                     |                    |                           | Y                         |
|                            | 141             | 139                   | A                     |                    |                           | R                         |
|                            | 142             | 140                   | S                     |                    |                           | G                         |
|                            | 149             | 147                   | M                     | I                  |                           |                           |
|                            | 156             | 154                   | D                     | N                  |                           |                           |
|                            | 168             | 166                   | N                     |                    |                           | D                         |
|                            | 170             | 168                   | R                     |                    |                           | G                         |
|                            | 176             | 174                   | L                     |                    | I                         |                           |
|                            | 209             | 207                   | E                     |                    |                           | K                         |
|                            | 216             | 214                   | T                     |                    |                           | I                         |
|                            | 224             | 222                   | T                     |                    |                           | A                         |
|                            | 232             | 230                   | T                     |                    |                           | A                         |
|                            | 235             | 233                   | E                     |                    | K                         |                           |
|                            | 252             | 250                   | K                     |                    |                           | R                         |
|                            | 264             | 262                   | G                     |                    | S                         |                           |
|                            | 310             | 308                   | T                     |                    |                           | R                         |
|                            | 311             | 309                   | K                     |                    |                           | R                         |
| Differences from consensus |                 |                       | -                     | 4                  | 4                         | 15                        |
| Differences from CVV       |                 |                       | 4                     | -                  | 8                         | 16                        |

**Table S2.** Amino acid differences between 1A.3.3.2 clade consensus, the within-clade human seasonal vaccine A/Idaho/07/2018, and the clade representative A/swine/Utah/A02432386/2019.

| 1A.3.3.2                  | H1<br>numbering | 1A.3.3.2<br>consensus | A/Idaho/07/2018 | A/swine/UT/A02432386/2019 |
|---------------------------|-----------------|-----------------------|-----------------|---------------------------|
|                           | 47              | V                     |                 | I                         |
|                           | 74              | R                     |                 | S                         |
|                           | 164             | T                     |                 | S                         |
|                           | 183             | P                     |                 | S                         |
|                           | 205             | R                     |                 | K                         |
|                           | 216             | T                     |                 | S                         |
|                           | 260             | D                     | N               | N                         |
|                           | 295             | I                     |                 | I                         |
| Difference from consensus |                 | -                     | 1               | 8                         |
| Difference from vaccine   |                 | 1                     | -               | 7                         |

**Table S3.** Amino acid differences between 1A.3.3.3 clade consensus, the within-clade CVV A/Ohio/09/2015, and the clade representative virus A/swine/Minnesota/A02245409/2020.

| 1A.3.3.3                   | H1<br>numbering | 1A.3.3.3<br>consensus | A/Ohio/09/2015 CVV | A/swine/MN/A02245409/2020 |
|----------------------------|-----------------|-----------------------|--------------------|---------------------------|
|                            | 2               | T                     | K                  |                           |
|                            | 3               | L                     | I                  |                           |
|                            | 36              | R                     | K                  |                           |
|                            | 71              | S                     | A                  |                           |
|                            | 83              | S                     |                    | P                         |
|                            | 84              | N                     | S                  |                           |
|                            | 86              | E                     | N                  |                           |
|                            | 113             | R                     | K                  |                           |
|                            | 120             | T                     |                    | A                         |
|                            | 127             | D                     | E                  |                           |
|                            | 137             | P                     |                    | S                         |
|                            | 146             | R                     | K                  |                           |
|                            | 149             | V                     | I                  |                           |
|                            | 153             | Q                     | K                  |                           |
|                            | 155             | G                     | E                  |                           |
|                            | 161             | V                     | I                  |                           |
|                            | 163             | K                     | I                  |                           |
|                            | 166             | I                     | T                  |                           |
|                            | 169             | K                     | R                  | R                         |
|                            | 170             | E                     | G                  |                           |
|                            | 183             | S                     | P                  |                           |
|                            | 186             | A                     | T                  |                           |
|                            | 192             | K                     | Q                  |                           |
|                            | 196             | D                     | N                  |                           |
|                            | 197             | A                     | S                  |                           |
|                            | 205             | K                     | R                  |                           |
|                            | 221             | D                     | G                  |                           |
|                            | 250             | A                     | V                  |                           |
|                            | 269             | D                     | E                  |                           |
|                            | 271             | S                     | P                  |                           |
| Differences from consensus |                 | -                     | 27                 | 4                         |
| Differences from CVV       |                 | 27                    | -                  | 29                        |

**Table S4.** Amino acid differences between 1B.2.1 clade consensus, the within-clade CVVs A/Ohio/35/2017 and A/Michigan/383/2018, and the clade representative virus A/swine/Illinois/A02139356/2018.

| 1B.2.1                     | H1<br>numbering | 1B.2.1<br>consensus | A/Ohio/35/2017 CVV | A/Michigan/383/2018 CVV | A/swine/IL/A02139356/2018 |
|----------------------------|-----------------|---------------------|--------------------|-------------------------|---------------------------|
|                            | 36              | S                   | T                  |                         |                           |
|                            | 71              | T                   | I                  | N                       |                           |
|                            | 72              | S                   | P                  |                         |                           |
|                            | 83              | S                   | P                  |                         |                           |
|                            | 96              | E                   | T                  |                         |                           |
|                            | 113             | K                   | R                  |                         |                           |
|                            | 120             | K                   | D                  |                         |                           |
|                            | 121             | S                   | G                  |                         |                           |
|                            | 129             | T                   | S                  |                         |                           |
|                            | 156             | N                   | G                  |                         |                           |
|                            | 169             | E                   | K                  |                         | K                         |
|                            | 170             | E                   |                    | G                       |                           |
|                            | 173             | I                   | V                  | V                       |                           |
|                            | 185             | M                   | I                  |                         |                           |
|                            | 189             | R                   | K                  |                         |                           |
|                            | 208             | R                   | K                  |                         |                           |
|                            | 209             | R                   | K                  |                         |                           |
|                            | 216             | K                   | R                  |                         |                           |
|                            | 259             | K                   |                    |                         | R                         |
|                            | 260             | G                   |                    | S                       |                           |
|                            | 261             | F                   | S                  |                         |                           |
|                            | 277             | T                   | A                  |                         |                           |
|                            | 289             | S                   | D                  |                         |                           |
|                            | 310             | A                   | T                  |                         |                           |
| Differences from consensus |                 | -                   | 21                 | 4                       | 2                         |
| Difference from OH/35 CVV  |                 | 21                  | -                  | 22                      | 21                        |
| Difference from MI/383 CVV |                 | 4                   | 22                 | -                       | 6                         |

**Table S5.** Amino acid differences between 1B.2.2.1 clade consensus, the within-clade CVV A/Iowa/32/2016 and the clade representative virus A/swine/Iowa/A02478968/2020.

| 1B.2.2.1                   | H1<br>numbering | 1B.2.2.1<br>consensus | A/Iowa/32/2016 CW | A/swine/IA/A02478968/2020 |
|----------------------------|-----------------|-----------------------|-------------------|---------------------------|
|                            | 19              | V                     | L                 |                           |
|                            | 74              | K                     |                   | E                         |
|                            | 84              | N                     |                   | D                         |
|                            | 96              | A                     | T                 |                           |
|                            | 132             | V                     | K                 |                           |
|                            | 141             | K                     | E                 |                           |
|                            | 166             | K                     |                   | E                         |
|                            | 168             | D                     | E                 |                           |
|                            | 237             | G                     |                   | R                         |
|                            | 273             | D                     |                   | N                         |
|                            | 277             | A                     |                   | T                         |
| Differences from consensus |                 | -                     | 5                 | 6                         |
| Differences from CVV       |                 | 5                     | -                 | 11                        |

**Table S6.** Amino acid differences between 1B.2.2.2 clade consensus and the clade representative virus A/swine/Colorado/A02245414/2020.

| 1B.2.2.2                   | H1<br>numbering | 1B.2.2.2<br>consensus | A/swine/CO/A02245414/2020 |
|----------------------------|-----------------|-----------------------|---------------------------|
|                            | 36              | S                     | N                         |
|                            | 50              | L                     | I                         |
|                            | 72              | S                     | P                         |
|                            | 85              | S                     | P                         |
|                            | 176             | L                     | I                         |
|                            | 208             | G                     | E                         |
|                            | 228             | N                     | K                         |
|                            | 236             | P                     | A                         |
|                            | 249             | I                     | V                         |
|                            | 271             | P                     | S                         |
|                            | 274             | E                     | K                         |
| Differences from consensus |                 | -                     | 11                        |

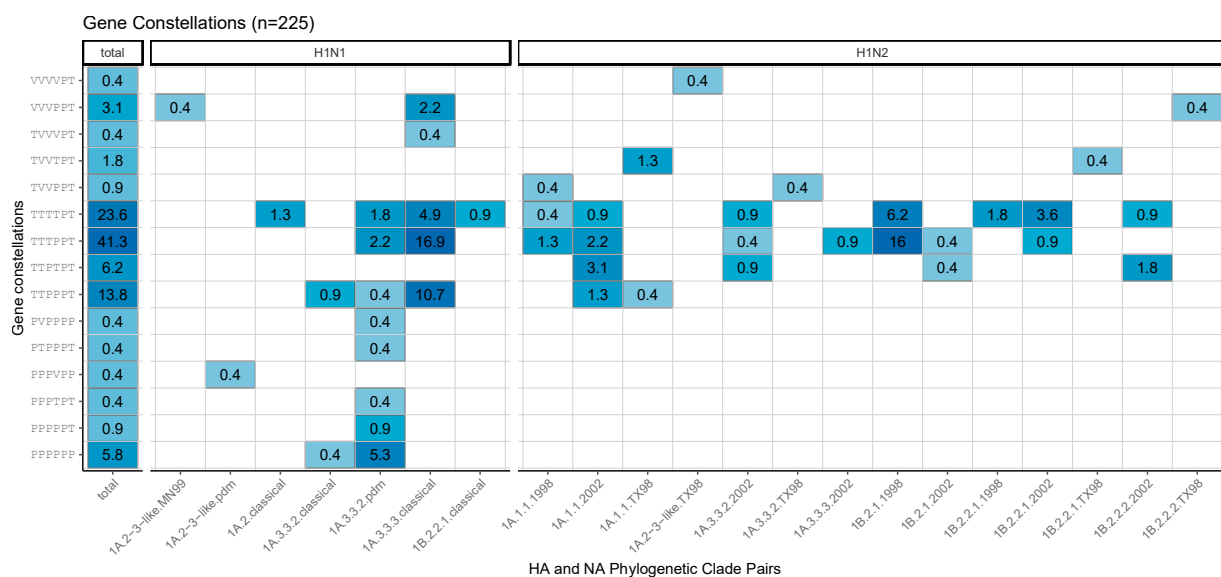

**Figure S1.** Proportions of detected H1N1 and H1N2 influenza A virus in swine collected in 2020 in the USDA influenza A virus in swine surveillance system. The x-axis reflects the paired genetic clade of hemagglutinin (HA) and neuraminidase (NA), and the y-axis reflects the evolutionary lineage (triple-reassortant, T; H1N1pdm09, P; live attenuated vaccine virus associated, V) of the internal genes in the order of PB2-PB1-PA-NP-M-NS.
